# Supplementary material
Source: ML conference proceedings conference paper supplement (https://openreview.net/forum?id=X7EMiddusV)
Supplement: supplementary_material [file attachment]

## Sheet: train
SOURCE DATABASE	PATH	MODEL ID	FULL MODEL NAME	SHORT ID	ORGANISM	METABOLITES	REACTIONS	MAX DEGREE METABOLITE	MAX DEGREE REACTION	ESSENTIAL REACTIONS (POSITIVE CLASS)	RATIO OF ESSENTIAL REACTIONS	METABOLITES OF OBJECTIVE REACTION	TOTAL NODES	RATIO OF ESSENTIAL REACTIONS OF THE TOTAL NODES
Biomodels	biomodels/processed/MODEL2002040002.xml	Afabarum	Ankrah2021 - Genome scale metabolic model of Drosophila gut microbe Acetobacter fabarum		Acetobacter fabarum	547	691	353	70	306	0.442836	70	1238	0.247173
Biomodels	biomodels/processed/MODEL1507180029.xml	MODEL1507180029	Kim2009 - Genome-scale metabolic network of Acinetobacter baumannii (AbyMBEL891)	AbyMBEL891	Acinetobacter baumannii (AbyMBEL891)	383	567	122	24	162	0.285714	12	950	0.170526
Bigg	bigg/processed/iCN718.xml	iCN718	Acinetobacter baumannii AYE	iCN718	Acinetobacter baumannii AYE	452	622	270	24	132	0.212219	11	1074	0.122905
Biomodels	biomodels/processed/MODEL1507180028.xml	MODEL1507180028	deOliveiraDalMolin2010 - Genome-scale metabolic network of Arabidopsis thaliana (AraGEM)	AraGEM	Arabidopsis thaliana	543	657	138	39	2	0.00304414	1	1200	0.00166667
Biomodels	biomodels/processed/MODEL1507180011.xml	MODEL1507180011	Saha2011 - Genome-scale metabolic network of Arabidopsis thaliana (iRS1597)	iRS1597	Arabidopsis thaliana (iRS1597)	377	368	128	40	283	0.769022	1	745	0.379866
Biomodels	biomodels/processed/MODEL1507180016.xml	MODEL1507180016	David2008 - Genome-scale metabolic network of Aspergillus nidulans (iHD666)	iHD666	Aspergillus nidulans	451	824	120	26	171	0.207524	26	1275	0.134118
Biomodels	biomodels/processed/MODEL1507180047.xml	MODEL1507180047	Andersen2009 - Genome-scale metabolic network of Aspergillus niger (iMA871)	iMA871	Aspergillus niger (iMA871)	888	1211	244	25	133	0.109827	1	2099	0.0633635
Biomodels	biomodels/processed/MODEL1507180056.xml	MODEL1507180056	Vongsangnak2008 - Genome-scale metabolic network of Aspergillus oryzae (iWV1314)	iWV1314	Aspergillus oryzae (iWV1314)	613	1564	275	24	1	0.000639386	1	2177	0.000459348
Biomodels	biomodels/processed/MODEL2207070001.xml	salarecon	Zakhartsev2022 - Constraint-based model of metabolism of Atlantic salmon (Salmo salar)	Salmo salar	Atlantic salmon (Salmo salar)	530	718	200	26	55	0.0766017	5	1248	0.0440705
Biomodels	biomodels/processed/MODEL1507180015.xml	MODEL1507180015	Henry2009 - Genome-scale metabolic network of Bacillus subtilis (iBsu1103)	iBsu1103	Bacillus subtilis (iBsu1103)	983	1332	588	63	292	0.219219	31	2315	0.126134
Biomodels	biomodels/processed/MODEL1507180013.xml	MODEL1507180013	Oh2007 - Genome-scale metabolic network of Bacillus subtilis (iYO844)	iYO844	Bacillus subtilis (iYO844)	689	957	432	62	98	0.102403	62	1646	0.0595383
Bigg	bigg/processed/iYO844.xml	iYO844	Bacillus subtilis subsp. subtilis str. 168	iYO844	Bacillus subtilis subsp. subtilis str. 168	500	657	318	63	212	0.322679	63	1157	0.183232
Biomodels	biomodels/processed/MODEL1601050000.xml	MODEL1601050000	Ponce-de-Leon2015 - Genome-Scale Model of Bacterial Metabolism (MM130)	MM130	Bacterial Metabolism (MM130)	2038	3079	1251	21	0	0	2	5117	0
Biomodels	biomodels/processed/MODEL1311070000.xml	MODEL1311070000	Ponce-de-Léon2013 - Genome scale metabolic model for Blattabacterium cuenoti (iMP240)	iMP240	Blattabacterium cuenoti	386	423	174	57	310	0.732861	57	809	0.383189
Biomodels	biomodels/processed/MODEL2001310002.xml	AphBucHam	Blow2020 - Aphid Buchnera Hamiltonella multi-compartment metabolic model		Buchnera aphidicola	1019	1137	237	80	192	0.168865	47	2156	0.0890538
Biomodels	biomodels/processed/MODEL1012300000.xml	Buchnera_iSM197	MacDonald2011_GeneticMetabolicDeterminants_BuchnereAphidicola		Buchnere Aphidicola	239	247	97	47	216	0.874494	47	486	0.444444
Biomodels	biomodels/processed/MODEL1507180051.xml	MODEL1507180051	Fang2011 - Genome-scale metabolic network of Burkholderia cenocepacia (iKF1028)	iKF1028	Burkholderia cenocepacia (iKF1028)	550	649	322	71	338	0.520801	1	1199	0.281902
Biomodels	biomodels/processed/MODEL1704200001.xml	MODEL1704200001	Gebauer2016 - Genome-scale model of Caenorhabditis elegans metabolism (with bacteria)	with bacteria	Caenorhabditis elegans	806	1147	344	69	201	0.17524	69	1953	0.102919
Biomodels	biomodels/processed/MODEL2007280001.xml	iCEL1314	Yilmaz2020 - iCEL1314 (Tissue relevant C.Elegans metabolism model)	Tissue relevant C.Elegans metabolism model	Caenorhabditis elegans	1353	1936	466	50	188	0.0971074	6	3289	0.0571602
Biomodels	biomodels/processed/MODEL1704200000.xml	MODEL1704200000	Gebauer2016 - Genome-scale model of Caenorhabditis elegans metabolism (without bacteria)	without bacteria	Caenorhabditis elegans	811	1150	353	70	226	0.196522	70	1961	0.115247
Biomodels	biomodels/processed/MODEL1908040002.xml	SulZinClas	Ankrah2019 Syntrophic splitting of central carbon metabolism in host cells bearing functionally-different symbiotic bacteria		Central carbon metabolism in host cells bearing functionally-different symbiotic bacteria	486	540	101	45	261	0.483333	39	1026	0.254386
Biomodels	biomodels/processed/MODEL1507180030.xml	MODEL1507180030	Lee2008 - Genome-scale metabolic network of Clostridium acetobutylicum (iJL432)	iJL432	Clostridium acetobutylicum	303	342	72	24	214	0.625731	1	645	0.331783
Biomodels	biomodels/processed/MODEL1507180027.xml	MODEL1507180027	Senger2008 - Genome-scale metabolic network of Clostridium acetobutylicum (iCac802)	iCac802	Clostridium acetobutylicum (iCac802)	414	490	199	29	205	0.418367	1	904	0.22677
Biomodels	biomodels/processed/MODEL1507180034.xml	MODEL1507180034	Milne2011 - Genome-scale metabolic network of Clostridium beijerinckii (iCB925)	iCB925	Clostridium beijerinckii (iCB925)	362	501	246	25	161	0.321357	12	863	0.186559
Biomodels	biomodels/processed/MODEL2205060002.xml	iCdG709	Jenior2021 - Clostridium difficile 630 model		Clostridium difficile 630 model	632	868	402	30	107	0.123272	11	1500	0.0713333
Bigg	bigg/processed/iHN637.xml	iHN637	Clostridium ljungdahlii DSM 13528	iHN637	Clostridium ljungdahlii DSM 13528	448	524	260	82	323	0.616412	82	972	0.332305
Biomodels	biomodels/processed/MODEL1507180004.xml	MODEL1507180004	Roberts2010 - Genome-scale metabolic network of Clostridium thermocellum (iSR432)	iSR432	Clostridium thermocellum	288	351	167	60	206	0.586895	60	639	0.322379
Biomodels	biomodels/processed/MODEL2112300001.xml	cryzym	Berzins2022 - Crypthecodinium cohnii medium scale model		Crypthecodinium cohnii	309	303	87	35	173	0.570957	1	612	0.28268
Biomodels	biomodels/processed/MODEL1308180000.xml	MODEL1308180000	Rex2013 - Genome scale metabolic model of D.shibae (iDsh827)	iDsh827	Dinoroseobacter shibae	571	691	348	116	334	0.483357	6	1262	0.264659
Biomodels	biomodels/processed/MODEL1310110044.xml	MODEL1310110044	Thiele2013 - Cervix uterine squamous epithelial cells		epithelial cells Cervix uterine squamous	1163	1766	244	41	28	0.015855	41	2929	0.00955958
Biomodels	biomodels/processed/MODEL1602080000.xml	MODEL1602080000	Choudhary2016 - Epithelial to mesenchymal transition (EMT) metabolic network	EMT	Epithelial to mesenchymal transition (EMT) metabolic network	1692	2845	510	41	61	0.0214411	41	4537	0.013445
Biomodels	biomodels/processed/MODEL1108160000.xml	iJO1366	Orth2011_E.coli_MetabolicNetwork		Escherichia coli	1155	1705	803	106	289	0.169501	72	2860	0.101049
Biomodels	biomodels/processed/MODEL1105030000.xml	MODEL1105030000	Zhuang2011 - Ecoli FBA with membrane economics		Escherichia coli	1033	1528	679	67	281	0.183901	67	2561	0.109723
Biomodels	biomodels/processed/MODEL1507180010.xml	MODEL1507180010	Archer2011 - Genome-scale metabolic model of Escherichia coli (iCA1273)	iCA1273	Escherichia coli	1054	1549	675	67	277	0.178825	67	2603	0.106416
Biomodels	biomodels/processed/MODEL3023609334.xml	Ec_iAF1260_flux1	Feist2007_EcMetabol_flux1		Escherichia coli	1134	1634	684	67	295	0.180539	67	2768	0.106575
Bigg	bigg/processed/iECBD_1354.xml	iECBD_1354	Escherichia coli 'BL21-Gold(DE3)pLysS AG'	iECBD_1354	Escherichia coli 'BL21-Gold(DE3)pLysS AG'	1089	1651	767	72	293	0.177468	72	2740	0.106934
Biomodels	biomodels/processed/MODEL1507180060.xml	MODEL1507180060	Reed2003 - Genome-scale metabolic network of Escherichia coli (iJR904)	iJR904	Escherichia coli (iJR904)	450	667	319	53	218	0.326837	53	1117	0.195166
Bigg	bigg/processed/iEC042_1314.xml	iEC042_1314	Escherichia coli 042	iEC042_1314	Escherichia coli 042	1084	1644	768	72	287	0.174574	72	2728	0.105205
Bigg	bigg/processed/iECP_1309.xml	iECP_1309	Escherichia coli 536	iECP_1309	Escherichia coli 536	1094	1668	783	72	287	0.172062	72	2762	0.10391
Bigg	bigg/processed/iEC55989_1330.xml	iEC55989_1330	Escherichia coli 55989	iEC55989_1330	Escherichia coli 55989	1103	1670	780	72	287	0.171856	72	2773	0.103498
Bigg	bigg/processed/iECABU_c1320.xml	iECABU_c1320	Escherichia coli ABU 83972	iECABU_c1320	Escherichia coli ABU 83972	1094	1663	778	72	287	0.17258	72	2757	0.104099
Bigg	bigg/processed/iAPECO1_1312.xml	iAPECO1_1312	Escherichia coli APEC O1	iAPECO1_1312	Escherichia coli APEC O1	1096	1668	781	72	287	0.172062	72	2764	0.103835
Bigg	bigg/processed/iEC1349_Crooks.xml	iEC1349_Crooks	Escherichia coli ATCC 8739	iEC1349_Crooks	Escherichia coli ATCC 8739	1096	1671	759	72	275	0.164572	72	2767	0.0993856
Bigg	bigg/processed/iEcolC_1368.xml	iEcolC_1368	Escherichia coli ATCC 8739	iEcolC_1368	Escherichia coli ATCC 8739	1092	1653	771	72	287	0.173624	72	2745	0.104554
Bigg	bigg/processed/iECB_1328.xml	iECB_1328	Escherichia coli B str. REL606	iECB_1328	Escherichia coli B str. REL606	1096	1660	775	72	287	0.172892	72	2756	0.104136
Bigg	bigg/processed/iB21_1397.xml	iB21_1397	Escherichia coli BL21(DE3)	iB21_1397	Escherichia coli BL21(DE3)	1089	1650	767	72	293	0.177576	72	2739	0.106973
Bigg	bigg/processed/iEC1356_Bl21DE3.xml	iEC1356_Bl21DE3	Escherichia coli BL21(DE3)	iEC1356_Bl21DE3	Escherichia coli BL21(DE3)	1085	1650	753	72	282	0.170909	72	2735	0.103108
Bigg	bigg/processed/iECD_1391.xml	iECD_1391	Escherichia coli BL21(DE3)	iECD_1391	Escherichia coli BL21(DE3)	1089	1650	767	72	293	0.177576	72	2739	0.106973
Bigg	bigg/processed/iBWG_1329.xml	iBWG_1329	Escherichia coli BW2952	iBWG_1329	Escherichia coli BW2952	1164	1739	822	106	287	0.165037	72	2903	0.0988632
Bigg	bigg/processed/iEC1344_C.xml	iEC1344_C	Escherichia coli C	iEC1344_C	Escherichia coli C	1075	1614	757	72	285	0.17658	72	2689	0.105987
Bigg	bigg/processed/ic_1306.xml	ic_1306	Escherichia coli CFT073	ic_1306	Escherichia coli CFT073	1090	1656	775	72	282	0.17029	72	2746	0.102695
Bigg	bigg/processed/iECDH1ME8569_1439.xml	iECDH1ME8569_1439	Escherichia coli DH1	iECDH1ME8569_1439	Escherichia coli DH1	1101	1670	782	72	287	0.171856	72	2771	0.103573
Bigg	bigg/processed/iEcDH1_1363.xml	iEcDH1_1363	Escherichia coli DH1	iEcDH1_1363	Escherichia coli DH1	1099	1667	778	72	287	0.172166	72	2766	0.10376
Bigg	bigg/processed/iEC1368_DH5a.xml	iEC1368_DH5a	Escherichia coli DH5[alpha]	iEC1368_DH5a	Escherichia coli DH5[alpha]	1112	1693	776	72	281	0.165978	72	2805	0.100178
Bigg	bigg/processed/iECED1_1282.xml	iECED1_1282	Escherichia coli ED1a	iECED1_1282	Escherichia coli ED1a	1087	1644	766	72	290	0.176399	72	2731	0.106188
Bigg	bigg/processed/iETEC_1333.xml	iETEC_1333	Escherichia coli ETEC H10407	iETEC_1333	Escherichia coli ETEC H10407	1095	1658	775	72	287	0.1731	72	2753	0.10425
Bigg	bigg/processed/iEcHS_1320.xml	iEcHS_1320	Escherichia coli HS	iEcHS_1320	Escherichia coli HS	1094	1645	764	72	287	0.174468	72	2739	0.104783
Bigg	bigg/processed/iECIAI1_1343.xml	iECIAI1_1343	Escherichia coli IAI1	iECIAI1_1343	Escherichia coli IAI1	1087	1636	766	72	289	0.17665	72	2723	0.106133
Bigg	bigg/processed/iECIAI39_1322.xml	iECIAI39_1322	Escherichia coli IAI39	iECIAI39_1322	Escherichia coli IAI39	1044	1569	744	72	272	0.173359	72	2613	0.104095
Bigg	bigg/processed/iECOK1_1307.xml	iECOK1_1307	Escherichia coli IHE3034	iECOK1_1307	Escherichia coli IHE3034	1096	1670	783	72	287	0.171856	72	2766	0.10376
Biomodels	biomodels/processed/MODEL3023641273.xml	Ec_iAF1260_flux2	Feist2007_EcMetabol_flux2		Escherichia coli K-12 MG1655	1071	1488	616	67	313	0.210349	67	2559	0.122313
Bigg	bigg/processed/iEKO11_1354.xml	iEKO11_1354	Escherichia coli KO11FL	iEKO11_1354	Escherichia coli KO11FL	1098	1655	774	72	287	0.173414	72	2753	0.10425
Bigg	bigg/processed/iLF82_1304.xml	iLF82_1304	Escherichia coli LF82	iLF82_1304	Escherichia coli LF82	1082	1650	761	72	287	0.173939	72	2732	0.105051
Bigg	bigg/processed/iECNA114_1301.xml	iECNA114_1301	Escherichia coli NA114	iECNA114_1301	Escherichia coli NA114	1091	1656	775	72	287	0.173309	72	2747	0.104478
Bigg	bigg/processed/iECO103_1326.xml	iECO103_1326	Escherichia coli O103:H2 str. 12009	iECO103_1326	Escherichia coli O103:H2 str. 12009	1096	1660	775	72	288	0.173494	72	2756	0.104499
Bigg	bigg/processed/iECO111_1330.xml	iECO111_1330	Escherichia coli O111:H- str. 11128	iECO111_1330	Escherichia coli O111:H- str. 11128	1089	1651	773	72	287	0.173834	72	2740	0.104745
Bigg	bigg/processed/iE2348C_1286.xml	iE2348C_1286	Escherichia coli O127:H6 str. E2348/69	iE2348C_1286	Escherichia coli O127:H6 str. E2348/69	1087	1641	757	72	287	0.174893	72	2728	0.105205
Bigg	bigg/processed/iEcE24377_1341.xml	iEcE24377_1341	Escherichia coli O139:H28 str. E24377A	iEcE24377_1341	Escherichia coli O139:H28 str. E24377A	1092	1655	772	72	287	0.173414	72	2747	0.104478
Bigg	bigg/processed/iECH74115_1262.xml	iECH74115_1262	Escherichia coli O157:H7 str. EC4115	iECH74115_1262	Escherichia coli O157:H7 str. EC4115	1083	1636	763	72	287	0.175428	72	2719	0.105554
Bigg	bigg/processed/iECs_1301.xml	iECs_1301	Escherichia coli O157:H7 str. Sakai	iECs_1301	Escherichia coli O157:H7 str. Sakai	1087	1646	770	72	287	0.174362	72	2733	0.105013
Bigg	bigg/processed/iECSP_1301.xml	iECSP_1301	Escherichia coli O157:H7 str. TW14359	iECSP_1301	Escherichia coli O157:H7 str. TW14359	1087	1646	771	72	287	0.174362	72	2733	0.105013
Bigg	bigg/processed/iECO26_1355.xml	iECO26_1355	Escherichia coli O26:H11 str. 11368	iECO26_1355	Escherichia coli O26:H11 str. 11368	1098	1666	778	72	287	0.172269	72	2764	0.103835
Bigg	bigg/processed/iG2583_1286.xml	iG2583_1286	Escherichia coli O55:H7 str. CB9615	iG2583_1286	Escherichia coli O55:H7 str. CB9615	1087	1644	768	72	287	0.174574	72	2731	0.10509
Bigg	bigg/processed/iNRG857_1313.xml	iNRG857_1313	Escherichia coli O83:H1 str. NRG 857C	iNRG857_1313	Escherichia coli O83:H1 str. NRG 857C	1100	1675	783	72	287	0.171343	72	2775	0.103423
Bigg	bigg/processed/iECS88_1305.xml	iECS88_1305	Escherichia coli S88	iECS88_1305	Escherichia coli S88	1088	1653	774	72	287	0.173624	72	2741	0.104706
Bigg	bigg/processed/iECSE_1348.xml	iECSE_1348	Escherichia coli SE11	iECSE_1348	Escherichia coli SE11	1098	1664	776	72	287	0.172476	72	2762	0.10391
Bigg	bigg/processed/iECSF_1327.xml	iECSF_1327	Escherichia coli SE15	iECSF_1327	Escherichia coli SE15	1162	1743	823	106	287	0.164659	72	2905	0.0987952
Bigg	bigg/processed/iEcSMS35_1347.xml	iEcSMS35_1347	Escherichia coli SMS-3-5	iEcSMS35_1347	Escherichia coli SMS-3-5	1102	1673	783	72	287	0.171548	72	2775	0.103423
Bigg	bigg/processed/iECDH10B_1368.xml	iECDH10B_1368	Escherichia coli str. K-12 substr. DH10B	iECDH10B_1368	Escherichia coli str. K-12 substr. DH10B	1160	1736	820	106	281	0.161866	72	2896	0.0970304
Bigg	bigg/processed/iML1515.xml	iML1515	Escherichia coli str. K-12 substr. MG1655	iML1515	Escherichia coli str. K-12 substr. MG1655	1147	1744	809	70	271	0.15539	70	2891	0.0937392
Bigg	bigg/processed/iJO1366.xml	iJO1366	Escherichia coli str. K-12 substr. MG1655	iJO1366	Escherichia coli str. K-12 substr. MG1655	1155	1705	803	106	289	0.169501	72	2860	0.101049
Bigg	bigg/processed/iJR904.xml	iJR904	Escherichia coli str. K-12 substr. MG1655	iJR904	Escherichia coli str. K-12 substr. MG1655	450	667	319	53	218	0.326837	53	1117	0.195166
Bigg	bigg/processed/iEC1372_W3110.xml	iEC1372_W3110	Escherichia coli str. K-12 substr. W3110	iEC1372_W3110	Escherichia coli str. K-12 substr. W3110	1190	1794	828	106	281	0.156633	72	2984	0.0941689
Bigg	bigg/processed/iY75_1357.xml	iY75_1357	Escherichia coli str. K-12 substr. W3110	iY75_1357	Escherichia coli str. K-12 substr. W3110	1101	1670	781	72	287	0.171856	72	2771	0.103573
Biomodels	biomodels/processed/MODEL2204180001.xml	iDK1463	Kim2021 - Development of a Genome-Scale Metabolic Model and Phenome Analysis of the Probiotic Escherichia coli Strain Nissle 1917		Escherichia coli Strain Nissle 1917	1115	1744	822	70	270	0.154817	70	2859	0.0944386
Bigg	bigg/processed/iUMN146_1321.xml	iUMN146_1321	Escherichia coli UM146	iUMN146_1321	Escherichia coli UM146	1096	1670	783	72	287	0.171856	72	2766	0.10376
Bigg	bigg/processed/iECUMN_1333.xml	iECUMN_1333	Escherichia coli UMN026	iECUMN_1333	Escherichia coli UMN026	1093	1657	769	72	289	0.174412	72	2750	0.105091
Bigg	bigg/processed/iUMNK88_1353.xml	iUMNK88_1353	Escherichia coli UMNK88	iUMNK88_1353	Escherichia coli UMNK88	1098	1665	780	72	287	0.172372	72	2763	0.103873
Bigg	bigg/processed/iUTI89_1310.xml	iUTI89_1310	Escherichia coli UTI89	iUTI89_1310	Escherichia coli UTI89	1096	1662	776	72	287	0.172684	72	2758	0.104061
Bigg	bigg/processed/iECW_1372.xml	iECW_1372	Escherichia coli W	iECW_1372	Escherichia coli W	1102	1668	780	72	287	0.172062	72	2770	0.10361
Bigg	bigg/processed/iWFL_1372.xml	iWFL_1372	Escherichia coli W	iWFL_1372	Escherichia coli W	1102	1668	780	72	287	0.172062	72	2770	0.10361
Bigg	bigg/processed/iEC1364_W.xml	iEC1364_W	Escherichia coli W	iEC1364_W	Escherichia coli W	1181	1773	816	106	280	0.157924	72	2954	0.0947867
Biomodels	biomodels/processed/MODEL1507180003.xml	MODEL1507180003	Raghunathan2010 - Genome-scale metabolic network of Francisella tularensis (iRS605)	iRS605	Francisella tularensis	333	463	199	52	179	0.386609	52	796	0.224874
Biomodels	biomodels/processed/MODEL2109240001.xml	M_yeastGEM_v8__46__3__46__5	Lu2021-Genome scale metabolic models for 11 outgroup fungi species		Fungi	1281	1950	295	41	240	0.123077	1	3231	0.0742804
Biomodels	biomodels/processed/MODEL2204150001.xml	iMK1321	Kulyashov2020 - Genome-Scale Metabolic Model for Geobacillus icigianus		Geobacillus icigianus	622	807	446	100	328	0.406444	100	1429	0.229531
Biomodels	biomodels/processed/MODEL1507180053.xml	MODEL1507180053	Schilling2000- Genome-scale metabolic network of Haemophilus influenzae (iCS400)	iCS400	Haemophilus influenzae	373	475	97	47	130	0.273684	47	848	0.153302
Biomodels	biomodels/processed/MODEL2204040002.xml	default_model	Lopez2022 - Genome-scale metabolic network of Haemophilus influenzae RdKW20 (iNL638)	iNL638	Haemophilus influenzae RdKW20	688	861	375	90	277	0.321719	90	1549	0.178825
Biomodels	biomodels/processed/MODEL1507180007.xml	MODEL1507180007	Thiele2005 - Genome-scale metabolic network of Helicobacter pylori (iIT341)	iIT341	Helicobacter pylori	372	429	211	56	264	0.615385	56	801	0.329588
Biomodels	biomodels/processed/MODEL1507180037.xml	MODEL1507180037	Schilling2002 - Genome-scale metabolic network of Helicobacter pylori (iCS291)	iCS291	Helicobacter pylori (iCS291)	340	444	72	47	182	0.40991	47	784	0.232143
Bigg	bigg/processed/iIT341.xml	iIT341	Helicobacter pylori 26695	iIT341	Helicobacter pylori 26695	369	427	211	56	262	0.613583	56	796	0.329146
Biomodels	biomodels/processed/MODEL1106080000.xml		Bordbar2011_HumanErythrocyte_MetabolicNetwork		Human Erythrocyte	333	453	187	9	6	0.013245	9	786	0.00763359
Biomodels	biomodels/processed/MODEL1106160000.xml	iAS253	Smith2011_HumanHeartMitochondrian_MetabolicModel		Human Heart Mitochondrian	379	463	136	21	3	0.00647948	6	842	0.00356295
Biomodels	biomodels/processed/MODEL1111070003.xml	Bordbar2011_MultiTissueType_MetabolicNetwork	Bordbar2011_MultiTissueType_MetabolicNetwork		Human multi-tissue	1206	1476	122	29	13	0.00880759	1	2682	0.00484713
Biomodels	biomodels/processed/MODEL1507180039.xml	MODEL1507180039	Zou2012 - Genome-scale metabolic network of Ketogulonicigenium vulgare (iWZ663)	iWZ663	Ketogulonicigenium vulgare (iWZ663)	532	702	307	49	96	0.136752	49	1234	0.0777958
Biomodels	biomodels/processed/MODEL1011080004.xml	hum_comp_3_26	Chang2010_Reduced_Kidney_FBA		Kidney Reduced	340	443	86	46	76	0.171558	46	783	0.0970626
Biomodels	biomodels/processed/MODEL1011090000.xml	ref_model_for_SBML	Goffin2010_L_plantarum_Metabolism		Lactiplantibacillus plantarum	524	610	267	47	1	0.00163934	5	1134	0.000881834
Biomodels	biomodels/processed/MODEL2002040005.xml	Lbrevis	Ankrah2021 - Genome scale metabolic model of Drosophila gut microbe Lactobacillus brevis		Lactobacillus brevis Drosophila gut microbe	420	503	232	47	207	0.411531	23	923	0.224269
Biomodels	biomodels/processed/MODEL2210190002.xml	M_LbCs_BL23	Koduru2022 - Lactobacillus casei BL23		Lactobacillus casei BL23	444	612	308	47	163	0.26634	20	1056	0.154356
Biomodels	biomodels/processed/MODEL2210190003.xml	M_LbCs_LC5	Koduru2022 - Lactobacillus casei LC5		Lactobacillus casei LC5	449	619	306	47	164	0.264943	20	1068	0.153558
Biomodels	biomodels/processed/MODEL2210190001.xml	M_LbCs	Koduru2022 - Lactobacillus casei subsp. casei ATCC 393		Lactobacillus casei subsp. casei ATCC 393	425	563	284	47	168	0.298401	20	988	0.17004
Biomodels	biomodels/processed/MODEL2002040006.xml	Lplantarum	Ankrah2021 - Genome scale metabolic model of Drosophila gut microbe Lactobacillus plantarum		Lactobacillus plantarum	485	586	279	47	250	0.426621	23	1071	0.233427
Biomodels	biomodels/processed/MODEL1507180045.xml	MODEL1507180045	Teusink2006 - Genome-scale metabolic network of Lactobacillus plantarum (iBT721)	iBT721	Lactobacillus plantarum (iBT721)	534	658	317	47	28	0.0425532	1	1192	0.0234899
Biomodels	biomodels/processed/MODEL1507180014.xml	MODEL1507180014	Oliveira2005 - Genome-scale metabolic network of Lactococcus lactis (iAO358)	iAO358	Lactococcus lactis	392	701	113	24	48	0.0684736	1	1093	0.0439158
Bigg	bigg/processed/iNF517.xml	iNF517	Lactococcus lactis subsp. cremoris MG1363	iNF517	Lactococcus lactis subsp. cremoris MG1363	435	513	249	48	179	0.348928	21	948	0.188819
Biomodels	biomodels/processed/MODEL1507180059.xml	MODEL1507180059	Chavali2008 - Genome-scale metabolic network of Leishmania major (iAC560)	iAC560	Leishmania major	625	714	147	45	111	0.155462	45	1339	0.0828977
Biomodels	biomodels/processed/MODEL1507180025.xml	MODEL1507180025	Hong2004 - Genome-scale metabolic network of Mannheimia succiniciproducens (iSH335)	iSH335	Mannheimia succiniciproducens	244	289	67	22	164	0.567474	8	533	0.307692
Biomodels	biomodels/processed/MODEL1507180062.xml	MODEL1507180062	Kim2007 - Genome-scale metabolic network of Mannheimia succiniciproducens (iTY425)	iTY425	Mannheimia succiniciproducens (iTY425)	433	583	121	23	159	0.272727	1	1016	0.156496
Biomodels	biomodels/processed/MODEL1607200000.xml	MODEL1607200000	Richards2016 - Genome-scale metabolic reconstruction of Methanococcus maripaludis (iMR539)	iMR539	Methanococcus maripaludis (iMR539)	402	436	185	73	314	0.720183	73	838	0.374702
Biomodels	biomodels/processed/MODEL1507180035.xml	MODEL1507180035	Kumar2011 - Genome-scale metabolic network of Methanosarcina acetivorans (iVS941)	iVS941	Methanosarcina acetivorans	423	502	253	67	284	0.565737	67	925	0.307027
Biomodels	biomodels/processed/MODEL1507180067.xml	MODEL1507180067	Quek2008 - Genome-scale metabolic network of Mus musculus		Mus musculus	599	860	219	39	124	0.144186	39	1459	0.0849897
Biomodels	biomodels/processed/MODEL1310110025.xml	MODEL1310110025	Thiele2013 - Smooth muscle smooth muscle cells		Muscle smooth cells	1216	1800	244	41	28	0.0155556	41	3016	0.00928382
Biomodels	biomodels/processed/MODEL8568434338.xml	M_MAP	Raman2005 - Mycolic acid pathway of M. tuberculosis		Mycobacterium tuberculosis	198	248	80	7	170	0.685484	6	446	0.381166
Biomodels	biomodels/processed/MODEL1507180001.xml	MODEL1507180001	Jamshidi2007 - Genome-scale metabolic network of Mycobacterium tuberculosis (iNJ661)	iNJ661	Mycobacterium tuberculosis (iNJ661)	579	740	376	95	314	0.424324	95	1319	0.238059
Bigg	bigg/processed/iEK1008.xml	iEK1008	Mycobacterium tuberculosis H37Rv	iEK1008	Mycobacterium tuberculosis H37Rv	688	893	450	106	356	0.398656	106	1581	0.225174
Bigg	bigg/processed/iNJ661.xml	iNJ661	Mycobacterium tuberculosis H37Rv	iNJ661	Mycobacterium tuberculosis H37Rv	579	740	376	95	314	0.424324	95	1319	0.238059
Biomodels	biomodels/processed/MODEL1011090001.xml	macrophage	Bordbar2010_Macrophage_Metabolism		Mycobacterium tuberculosis Macrophage	1103	1681	353	49	117	0.0696014	49	2784	0.0420259
Biomodels	biomodels/processed/MODEL1507180052.xml	MODEL1507180052	Suthers2009 - Genome-scale metabolic network of Mycoplasma genitalium (iPS189)	iPS189	Mycoplasma genitalium (iPS189)	271	278	104	84	176	0.633094	84	549	0.320583
Biomodels	biomodels/processed/MODEL1212060001.xml	MODEL1212060001	Dreyfuss2013 - Genome-Scale Metabolic Model - N.crassa iJDZ836		Neurospora crassa	764	1469	524	41	185	0.125936	12	2233	0.0828482
Bigg	bigg/processed/iLB1027_lipid.xml	iLB1027_lipid	Phaeodactylum tricornutum CCAP 1055/1	iLB1027_lipid	Phaeodactylum tricornutum CCAP 1055/1	1814	4047	1096	48	359	0.0887077	1	5861	0.0612523
Biomodels	biomodels/processed/MODEL1510220000.xml	MODEL1510220000	Irani2015 - Genome-scale metabolic model of P.pastoris N-glycosylation		Pichia pastoris	912	1120	234	55	223	0.199107	2	2032	0.109744
Biomodels	biomodels/processed/MODEL1507180065.xml	MODEL1507180065	Caspeta2012 - Genome-scale metabolic network of Pichia pastoris (iLC915)	iLC915	Pichia pastoris (iLC915)	790	1003	230	54	48	0.0478564	1	1793	0.0267708
Biomodels	biomodels/processed/MODEL1507180050.xml	MODEL1507180050	Sohn2010 - Genome-scale metabolic network of Pichia pastoris (PpaMBEL1254)	PpaMBEL1254	Pichia pastoris (PpaMBEL1254)	459	670	285	24	14	0.0208955	5	1129	0.0124004
Biomodels	biomodels/processed/MODEL1507180022.xml	MODEL1507180022	Caspeta2012 - Genome-scale metabolic network of Pichia stipitis (iSS884)	iSS884	Pichia stipitis	677	863	212	54	92	0.106605	1	1540	0.0597403
Bigg	bigg/processed/iAM_Pb448.xml	iAM_Pb448	Plasmodium berghei	iAM_Pb448	Plasmodium berghei	636	834	255	82	197	0.236211	82	1470	0.134014
Bigg	bigg/processed/iAM_Pc455.xml	iAM_Pc455	Plasmodium cynomolgi strain B	iAM_Pc455	Plasmodium cynomolgi strain B	648	850	259	82	192	0.225882	82	1498	0.128171
Bigg	bigg/processed/iAM_Pf480.xml	iAM_Pf480	Plasmodium falciparum 3D7	iAM_Pf480	Plasmodium falciparum 3D7	654	861	265	82	192	0.222997	82	1515	0.126733
Bigg	bigg/processed/iAM_Pk459.xml	iAM_Pk459	Plasmodium knowlesi strain H	iAM_Pk459	Plasmodium knowlesi strain H	652	856	260	82	192	0.224299	82	1508	0.127321
Bigg	bigg/processed/iAM_Pv461.xml	iAM_Pv461	Plasmodium vivax Sal-1	iAM_Pv461	Plasmodium vivax Sal-1	652	856	260	82	192	0.224299	82	1508	0.127321
Biomodels	biomodels/processed/MODEL1507180038.xml	MODEL1507180038	Mazumdar2008 - Genome-scale metabolic network of Porphyromonas gingivalis (iVM679)	iVM679	Porphyromonas gingivalis (iVM679)	417	528	236	56	170	0.32197	56	945	0.179894
Biomodels	biomodels/processed/MODEL1507180044.xml	MODEL1507180044	Puchalka2008 - Genome-scale metabolic network of Pseudomonas putida (iJP815)	iJP815	Pseudomonas putida	475	564	285	53	261	0.462766	1	1039	0.251203
Biomodels	biomodels/processed/MODEL1507180068.xml	MODEL1507180068	Nogales2008 - Genome-scale metabolic network of Pseudomonas putida (iJN746)	iJN746	Pseudomonas putida (iJN746)	539	652	295	59	264	0.404908	59	1191	0.221662
Biomodels	biomodels/processed/MODEL1507180043.xml	MODEL1507180043	Sohn2010 - Genome-scale metabolic network of Pseudomonas putida (PpuMBEL1071)	PpuMBEL1071	Pseudomonas putida (PpuMBEL1071)	465	672	120	24	100	0.14881	10	1137	0.0879507
Biomodels	biomodels/processed/MODEL1407250000.xml	MODEL1407250000	Taffi2014 - Extension of metabolic reconstruction of Pseudomonas putida KT2440 with aerobic pathway of PCBs degradation		Pseudomonas putida KT2440	560	682	307	59	255	0.3739	59	1242	0.205314
Bigg	bigg/processed/iJN1463.xml	iJN1463	Pseudomonas putida KT2440	iJN1463	Pseudomonas putida KT2440	1270	1767	796	106	406	0.229768	106	3037	0.133685
Bigg	bigg/processed/iJN746.xml	iJN746	Pseudomonas putida KT2440	iJN746	Pseudomonas putida KT2440	539	652	295	59	257	0.394172	59	1191	0.215785
Biomodels	biomodels/processed/MODEL1507180006.xml	MODEL1507180006	Resendis-Antonio2007 - Genome-scale metabolic network of Rhizobium etli (iOR363)	iOR363	Rhizobium etli (iOR363)	156	194	82	9	20	0.103093	6	350	0.0571429
Bigg	bigg/processed/STM_v1_0.xml	STM_v1_0	Salmonella enterica subsp. enterica serovar Typhimurium str. LT2	STM_v1_0	Salmonella enterica subsp. enterica serovar Typhimurium str. LT2	1086	1597	700	66	346	0.216656	66	2683	0.12896
Bigg	bigg/processed/iYS1720.xml	iYS1720	Salmonella pan-reactome	iYS1720	Salmonella pan-reactome	1677	2372	784	66	262	0.110455	55	4049	0.0647073
Biomodels	biomodels/processed/MODEL1507180009.xml	MODEL1507180009	AbuOun2009 - Genome-scale metabolic network of Salmonella typhimurium (iMA945)	iMA945	Salmonella typhimurium (iMA945)	1264	1827	672	67	130	0.0711549	67	3091	0.0420576
Biomodels	biomodels/processed/MODEL1507180058.xml	MODEL1507180058	Raghunathan2009 - Genome-scale metabolic network of Salmonella typhimurium (iRR1083)	iRR1083	Salmonella typhimurium (iRR1083)	708	1059	464	55	88	0.0830973	55	1767	0.0498019
Biomodels	biomodels/processed/MODEL1507180017.xml	MODEL1507180017	Thiele2011 - Genome-scale metabolic network of Salmonella Typhimurium (STM_v1_0)	STM_v1_0	Salmonella Typhimurium (STM_v1_0)	1086	1597	700	66	346	0.216656	66	2683	0.12896
Biomodels	biomodels/processed/MODEL1904090001.xml	tiny_example_12	Keating2019 - Minimal model demonstrating SBML Level 3 packages.			7	6	2	5	6	1	5	13	0.461538
Biomodels	biomodels/processed/MODEL1507180046.xml	MODEL1507180046	Nogales2012 - Genome-scale metabolic network of Synechocystis sp. PCC6803 (iJN678)	iJN678	Synechocystis sp. PCC6803 (iJN678)	593	668	353	119	668	1	118	1261	0.529738
Biomodels	biomodels/processed/MODEL1507180048.xml	MODEL1507180048	Zhang2009 - Genome-scale metabolic network of Thermotoga maritima		Thermotoga maritima	325	377	180	53	225	0.596817	53	702	0.320513
Bigg	bigg/processed/iLJ478.xml	iLJ478	Thermotoga maritima MSB8	iLJ478	Thermotoga maritima MSB8	331	385	187	53	221	0.574026	53	716	0.308659
Biomodels	biomodels/processed/MODEL2111120001.xml	Sl2183	Sl2183 - Tomato metabolic model		Tomato	791	1098	275	64	24	0.0218579	64	1889	0.0127051
Bigg	bigg/processed/iSSON_1240.xml	iSSON_1240	Shigella sonnei Ss046	iSSON_1240	Shigella sonnei Ss046	1066	1601	738	72	282	0.17614	72	2667	0.105737
Bigg	bigg/processed/iIS312.xml	iIS312	Trypanosoma cruzi Dm28c	iIS312	Trypanosoma cruzi Dm28c	212	232	58	43	59	0.25431	43	444	0.132883
Bigg	bigg/processed/iIS312_Epimastigote.xml	iIS312_Epimastigote	Trypanosoma cruzi Dm28c	iIS312_Epimastigote	Trypanosoma cruzi Dm28c	210	230	58	43	59	0.256522	43	440	0.134091
Bigg	bigg/processed/iIS312_Trypomastigote.xml	iIS312_Trypomastigote	Trypanosoma cruzi Dm28c	iIS312_Trypomastigote	Trypanosoma cruzi Dm28c	179	193	50	43	50	0.259067	38	372	0.134409
Bigg	bigg/processed/iIS312_Amastigote.xml	iIS312_Amastigote	Trypanosoma cruzi Dm28c	iIS312_Amastigote	Trypanosoma cruzi Dm28c	196	208	51	43	69	0.331731	43	404	0.170792
Bigg	bigg/processed/iSbBS512_1146.xml	iSbBS512_1146	Shigella boydii CDC 3083-94	iSbBS512_1146	Shigella boydii CDC 3083-94	1018	1540	709	72	293	0.19026	72	2558	0.114543
Bigg	bigg/processed/iSBO_1134.xml	iSBO_1134	Shigella boydii Sb227	iSBO_1134	Shigella boydii Sb227	1022	1530	715	72	293	0.191503	72	2552	0.114812
Bigg	bigg/processed/iSDY_1059.xml	iSDY_1059	Shigella dysenteriae Sd197	iSDY_1059	Shigella dysenteriae Sd197	1026	1502	682	72	282	0.18775	72	2528	0.111551
Biomodels	biomodels/processed/MODEL2003240001.xml	iGD1348	diCenzo2020 - Sinorhizobium meliloti 1021 genome-scale metabolic model		Sinorhizobium meliloti 1021	1159	1403	714	58	439	0.312901	58	2562	0.171351
Biomodels	biomodels/processed/MODEL1507180054.xml	MODEL1507180054	Liao2011 - Genome-scale metabolic reconstruction of Klebsiella pneumoniae (iYL1228)	iYL1228	Klebsiella pneumoniae (iYL1228)	830	1223	529	59	203	0.165985	59	2053	0.0988797
Bigg	bigg/processed/iYL1228.xml	iYL1228	Klebsiella pneumoniae subsp. pneumoniae MGH 78578	iYL1228	Klebsiella pneumoniae subsp. pneumoniae MGH 78578	830	1223	529	59	203	0.165985	59	2053	0.0988797
Biomodels	biomodels/processed/MODEL1507180008.xml	MODEL1507180008	Montagud2010 - Genome-scale metabolic network of Synechocystis sp. PCC6803 (iSyn669)	iSyn669	Synechocystis sp. PCC6803 (iSyn669)	392	498	135	43	212	0.425703	43	890	0.238202
Biomodels	biomodels/processed/MODEL1111070001.xml	Bordbar2011_TissueSpecificHepatocyte_MetabolicNetwork	Bordbar2011_TissueSpecific-Hepatocyte_MetabolicNetwork		Tissue Hepatocyte	537	629	146	45	232	0.368839	45	1166	0.198971
Biomodels	biomodels/processed/MODEL1111070000.xml	Bordbar2011_TissueSpecificAdipocyte_MetabolicNetwork	Bordbar2011_TissueSpecific-Adipocyte_MetabolicNetwork		Tissue Specific Adipocyte	510	578	128	43	245	0.423875	43	1088	0.225184
Biomodels	biomodels/processed/MODEL1507180036.xml	MODEL1507180036	Pinchuck2010 - Genome-scale metabolic network of Shewanella oneidensis (iSO783)	iSO783	Shewanella oneidensis (iSO783)	528	696	297	46	199	0.28592	30	1224	0.162582
Biomodels	biomodels/processed/MODEL1011300000.xml	Kim2010_VvuMBEL943_V_vulnificus	Kim2011_VvuMBEL943_2022		Vibrio vulnificus	460	704	137	24	141	0.200284	1	1164	0.121134
Biomodels	biomodels/processed/MODEL1912100001.xml	COBRAModel	Konduru2020 - Genome-scale metabolic reconstruction and in silico analysis of rice leaf blight pathogen, Xanthomonas oryzae		Xanthomonas oryzae	495	657	330	53	194	0.295282	1	1152	0.168403
Biomodels	biomodels/processed/MODEL1507180049.xml	MODEL1507180049	Borodina2005 - Genome-scale metabolic network of Streptomyces coelicolor (iIB711)	iIB711	Streptomyces coelicolor	435	906	150	24	89	0.098234	12	1341	0.0663684
Biomodels	biomodels/processed/MODEL1507180064.xml	MODEL1507180064	Saha2011- Genome-scale metabolic network of Zea mays (iRS1563)	iRS1563	Zea mays	465	499	174	19	297	0.59519	1	964	0.308091
Biomodels	biomodels/processed/MODEL2204110002.xml	RQ7_iJG408	Gautam2020-Metabolic network of Thermotoga sp. Strain RQ7		Thermotoga sp. Strain RQ7	415	490	249	26	275	0.561224	15	905	0.303867
Bigg	bigg/processed/iPC815.xml	iPC815	Yersinia pestis CO92	iPC815	Yersinia pestis CO92	761	1065	466	62	214	0.200939	60	1826	0.117196
Biomodels	biomodels/processed/MODEL2204110001.xml	Chromohalobacter				1106	1704	858	59	176	0.103286	59	2810	0.0626335
Biomodels	biomodels/processed/MODEL1507180031.xml	MODEL1507180031	Lee2010 - Genome-scale metabolic network of Zymomonas mobilis (iZmobMBEL601)	iZmobMBEL601	Zymomonas mobilis (iZmobMBEL601)	326	401	78	24	209	0.521197	12	727	0.287483
Biomodels	biomodels/processed/MODEL1908040003.xml	SulClas	Ankrah2019 Syntrophic splitting of central carbon metabolism in host cells bearing functionally-different symbiotic bacteria_SulciaClastoptera		Sulcia Clastoptera	368	419	98	44	189	0.451074	39	787	0.240152
Biomodels	biomodels/processed/MODEL1908040004.xml	iZinClas	Ankrah2019 Syntrophic splitting of central carbon metabolism in host cells bearing functionally-different symbiotic bacteria_ZinderiaClastoptera		Zinderia Clastoptera	356	399	99	45	186	0.466165	39	755	0.246358
Biomodels	biomodels/processed/MODEL2205020001.xml	model_spneumoniaeR6	Dias2019 - GSM model of S. pneumoniae R6		Streptococcus pneumoniae R6	355	438	99	22	151	0.344749	6	793	0.190416
Bigg	bigg/processed/iSFxv_1172.xml	iSFxv_1172	Shigella flexneri 2002017	iSFxv_1172	Shigella flexneri 2002017	1045	1554	715	72	285	0.183398	72	2599	0.109658
Bigg	bigg/processed/iS_1188.xml	iS_1188	Shigella flexneri 2a str. 2457T	iS_1188	Shigella flexneri 2a str. 2457T	1017	1504	712	72	283	0.188165	72	2521	0.112257
Bigg	bigg/processed/iSF_1195.xml	iSF_1195	Shigella flexneri 2a str. 301	iSF_1195	Shigella flexneri 2a str. 301	1022	1512	716	72	281	0.185847	72	2534	0.110892
Bigg	bigg/processed/iSFV_1184.xml	iSFV_1184	Shigella flexneri 5 str. 8401	iSFV_1184	Shigella flexneri 5 str. 8401	1026	1516	719	72	294	0.193931	72	2542	0.115657
Bigg	bigg/processed/iSB619.xml	iSB619	Staphylococcus aureus subsp. aureus N315	iSB619	Staphylococcus aureus subsp. aureus N315	381	450	225	61	244	0.542222	61	831	0.293622
Biomodels	biomodels/processed/MODEL1507180012.xml	MODEL1507180012	Förster2008 - Genome-scale metabolic network of Saccharamyces cerevisiae (iFF708)	iFF708	Saccharamyces cerevisiae (iFF708)	469	1021	165	45	33	0.0323213	45	1490	0.0221477
Biomodels	biomodels/processed/MODEL1507180033.xml	MODEL1507180033	Mo2009 - Genome-scale metabolic network of Saccharomyces cerevisiae (iMM904)	iMM904	Saccharomyces cerevisiae (iMM904)	637	883	332	47	168	0.19026	47	1520	0.110526
Biomodels	biomodels/processed/MODEL1507180019.xml	MODEL1507180019	Duarte2004 - Genome-scale metabolic network of Saccharomyces cerevisiae (iND750)	iND750	Saccharomyces cerevisiae (iND750)	479	631	234	46	182	0.288431	46	1110	0.163964
Bigg	bigg/processed/iND750.xml	iND750	Saccharomyces cerevisiae S288C	iND750	Saccharomyces cerevisiae S288C	479	631	234	46	182	0.288431	46	1110	0.163964
Bigg	bigg/processed/iMM904.xml	iMM904	Saccharomyces cerevisiae S288C	iMM904	Saccharomyces cerevisiae S288C	637	883	332	47	168	0.19026	47	1520	0.110526
Biomodels	biomodels/processed/MODEL1507180005.xml	MODEL1507180005	Alam2010 - Genome-scale metabolic network of Streptomyces coelicolor		Streptomyces coelicolor	594	857	226	24	76	0.0886814	12	1451	0.0523777
Biomodels	biomodels/processed/MODEL1508190002.xml	MODEL1508190002	Kerkhoven2016 - Genome-scale metabolic model of Yarrowia lipolytica		Yarrowia lipolytica	820	1050	256	21	228	0.217143	1	1870	0.121925
Biomodels	biomodels/processed/MODEL1507180061.xml	MODEL1507180061	Sohn2012 - Genome-scale metabolic network of Schizosaccharomyces pombe (SpoMBEL1693)	SpoMBEL1693	Schizosaccharomyces pombe (SpoMBEL1693)	621	876	315	24	95	0.108447	9	1497	0.0634603
					STATS
					MIN	7	6	2	5	0	0	1	13
					MAX	2038	4047	1251	119	668	1	118	5861	0.529738
					MEAN	773.097	1115.43	448.041	58.5949	217.954	0.255843	49.4359	1888.52	0.14352
					STD	362.716	612.205	281.85	22.6746	99.919	0.185609	29.0932	969.175	0.0949777
