# Supplementary material
Source: ML conference proceedings conference paper supplement (https://openreview.net/forum?id=X7EMiddusV)
Supplement: supplementary_material [file test.xlsx]

## Sheet: test2
SOURCE DATABASE	PATH	MODEL ID	FULL MODEL NAME	SHORT ID	ORGANISM	METABOLITES	REACTIONS	MAX DEGREE METABOLITE	MAX DEGREE REACTION	ESSENTIAL REACTIONS (POSITIVE CLASS)	RATIO OF ESSENTIAL REACTIONS	METABOLITES OF OBJECTIVE REACTION
Biomodels	biomodels/processed/MODEL1507180064.xml	MODEL1507180064	Saha2011- Genome-scale metabolic network of Zea mays (iRS1563)	iRS1563	Zea mays	465	499	174	19	297	0.59519	1
Biomodels	biomodels/processed/MODEL2204110002.xml	RQ7_iJG408	Gautam2020-Metabolic network of Thermotoga sp. Strain RQ7		Thermotoga sp. Strain RQ7	415	490	249	26	275	0.561224	15
Bigg	bigg/processed/iPC815.xml	iPC815	Yersinia pestis CO92	iPC815	Yersinia pestis CO92	761	1065	466	62	214	0.200939	60
Biomodels	biomodels/processed/MODEL2204110001.xml	Chromohalobacter				1106	1704	858	59	176	0.103286	59
Biomodels	biomodels/processed/MODEL1507180031.xml	MODEL1507180031	Lee2010 - Genome-scale metabolic network of Zymomonas mobilis (iZmobMBEL601)	iZmobMBEL601	Zymomonas mobilis (iZmobMBEL601)	326	401	78	24	209	0.521197	12
Biomodels	biomodels/processed/MODEL1908040003.xml	SulClas	Ankrah2019 Syntrophic splitting of central carbon metabolism in host cells bearing functionally-different symbiotic bacteria_SulciaClastoptera		Sulcia Clastoptera	368	419	98	44	189	0.451074	39
Biomodels	biomodels/processed/MODEL1908040004.xml	iZinClas	Ankrah2019 Syntrophic splitting of central carbon metabolism in host cells bearing functionally-different symbiotic bacteria_ZinderiaClastoptera		Zinderia Clastoptera	356	399	99	45	186	0.466165	39
Biomodels	biomodels/processed/MODEL2205020001.xml	model_spneumoniaeR6	Dias2019 - GSM model of S. pneumoniae R6		Streptococcus pneumoniae R6	355	438	99	22	151	0.344749	6
Bigg	bigg/processed/iSFxv_1172.xml	iSFxv_1172	Shigella flexneri 2002017	iSFxv_1172	Shigella flexneri 2002017	1045	1554	715	72	285	0.183398	72
Bigg	bigg/processed/iS_1188.xml	iS_1188	Shigella flexneri 2a str. 2457T	iS_1188	Shigella flexneri 2a str. 2457T	1017	1504	712	72	283	0.188165	72
Bigg	bigg/processed/iSF_1195.xml	iSF_1195	Shigella flexneri 2a str. 301	iSF_1195	Shigella flexneri 2a str. 301	1022	1512	716	72	281	0.185847	72
Bigg	bigg/processed/iSFV_1184.xml	iSFV_1184	Shigella flexneri 5 str. 8401	iSFV_1184	Shigella flexneri 5 str. 8401	1026	1516	719	72	294	0.193931	72
Bigg	bigg/processed/iSB619.xml	iSB619	Staphylococcus aureus subsp. aureus N315	iSB619	Staphylococcus aureus subsp. aureus N315	381	450	225	61	244	0.542222	61
Biomodels	biomodels/processed/MODEL1507180012.xml	MODEL1507180012	Förster2008 - Genome-scale metabolic network of Saccharamyces cerevisiae (iFF708)	iFF708	Saccharamyces cerevisiae (iFF708)	469	1021	165	45	33	0.0323213	45
Biomodels	biomodels/processed/MODEL1507180033.xml	MODEL1507180033	Mo2009 - Genome-scale metabolic network of Saccharomyces cerevisiae (iMM904)	iMM904	Saccharomyces cerevisiae (iMM904)	637	883	332	47	168	0.19026	47
Biomodels	biomodels/processed/MODEL1507180019.xml	MODEL1507180019	Duarte2004 - Genome-scale metabolic network of Saccharomyces cerevisiae (iND750)	iND750	Saccharomyces cerevisiae (iND750)	479	631	234	46	182	0.288431	46
Bigg	bigg/processed/iND750.xml	iND750	Saccharomyces cerevisiae S288C	iND750	Saccharomyces cerevisiae S288C	479	631	234	46	182	0.288431	46
Bigg	bigg/processed/iMM904.xml	iMM904	Saccharomyces cerevisiae S288C	iMM904	Saccharomyces cerevisiae S288C	637	883	332	47	168	0.19026	47
Biomodels	biomodels/processed/MODEL1507180005.xml	MODEL1507180005	Alam2010 - Genome-scale metabolic network of Streptomyces coelicolor		Streptomyces coelicolor	594	857	226	24	76	0.0886814	12
Biomodels	biomodels/processed/MODEL1508190002.xml	MODEL1508190002	Kerkhoven2016 - Genome-scale metabolic model of Yarrowia lipolytica		Yarrowia lipolytica	820	1050	256	21	228	0.217143	1
Biomodels	biomodels/processed/MODEL1507180061.xml	MODEL1507180061	Sohn2012 - Genome-scale metabolic network of Schizosaccharomyces pombe (SpoMBEL1693)	SpoMBEL1693	Schizosaccharomyces pombe (SpoMBEL1693)	621	876	315	24	95	0.108447	9
					STATS
					MIN	326	399	78	19	33	0.0323213	1
					MAX	1106	1704	858	72	297	0.59519	72
					MEAN	637.095	894.429	347.714	45.2381	200.762	0.282922	39.6667
					STD	267.532	440.488	246.304	18.8836	73.42	0.172105	25.3423
