# Supplementary material
Source: ML conference proceedings conference paper supplement (https://openreview.net/forum?id=X7EMiddusV)
Supplement: supplementary_material [file val.xlsx]

## Sheet: val2
SOURCE DATABASE	PATH	MODEL ID	FULL MODEL NAME	SHORT ID	ORGANISM	METABOLITES	REACTIONS	MAX DEGREE METABOLITE	MAX DEGREE REACTION	ESSENTIAL REACTIONS (POSITIVE CLASS)	RATIO OF ESSENTIAL REACTIONS	METABOLITES OF OBJECTIVE REACTION
Biomodels	biomodels/processed/MODEL1507180048.xml	MODEL1507180048	Zhang2009 - Genome-scale metabolic network of Thermotoga maritima		Thermotoga maritima	325	377	180	53	225	0.596817	53
Bigg	bigg/processed/iLJ478.xml	iLJ478	Thermotoga maritima MSB8	iLJ478	Thermotoga maritima MSB8	331	385	187	53	221	0.574026	53
Biomodels	biomodels/processed/MODEL2111120001.xml	Sl2183	Sl2183 - Tomato metabolic model		Tomato	791	1098	275	64	24	0.0218579	64
Bigg	bigg/processed/iSSON_1240.xml	iSSON_1240	Shigella sonnei Ss046	iSSON_1240	Shigella sonnei Ss046	1066	1601	738	72	282	0.17614	72
Bigg	bigg/processed/iIS312.xml	iIS312	Trypanosoma cruzi Dm28c	iIS312	Trypanosoma cruzi Dm28c	212	232	58	43	59	0.25431	43
Bigg	bigg/processed/iIS312_Epimastigote.xml	iIS312_Epimastigote	Trypanosoma cruzi Dm28c	iIS312_Epimastigote	Trypanosoma cruzi Dm28c	210	230	58	43	59	0.256522	43
Bigg	bigg/processed/iIS312_Trypomastigote.xml	iIS312_Trypomastigote	Trypanosoma cruzi Dm28c	iIS312_Trypomastigote	Trypanosoma cruzi Dm28c	179	193	50	43	50	0.259067	38
Bigg	bigg/processed/iIS312_Amastigote.xml	iIS312_Amastigote	Trypanosoma cruzi Dm28c	iIS312_Amastigote	Trypanosoma cruzi Dm28c	196	208	51	43	69	0.331731	43
Bigg	bigg/processed/iSbBS512_1146.xml	iSbBS512_1146	Shigella boydii CDC 3083-94	iSbBS512_1146	Shigella boydii CDC 3083-94	1018	1540	709	72	293	0.19026	72
Bigg	bigg/processed/iSBO_1134.xml	iSBO_1134	Shigella boydii Sb227	iSBO_1134	Shigella boydii Sb227	1022	1530	715	72	293	0.191503	72
Bigg	bigg/processed/iSDY_1059.xml	iSDY_1059	Shigella dysenteriae Sd197	iSDY_1059	Shigella dysenteriae Sd197	1026	1502	682	72	282	0.18775	72
Biomodels	biomodels/processed/MODEL2003240001.xml	iGD1348	diCenzo2020 - Sinorhizobium meliloti 1021 genome-scale metabolic model		Sinorhizobium meliloti 1021	1159	1403	714	58	439	0.312901	58
Biomodels	biomodels/processed/MODEL1507180054.xml	MODEL1507180054	Liao2011 - Genome-scale metabolic reconstruction of Klebsiella pneumoniae (iYL1228)	iYL1228	Klebsiella pneumoniae (iYL1228)	830	1223	529	59	203	0.165985	59
Bigg	bigg/processed/iYL1228.xml	iYL1228	Klebsiella pneumoniae subsp. pneumoniae MGH 78578	iYL1228	Klebsiella pneumoniae subsp. pneumoniae MGH 78578	830	1223	529	59	203	0.165985	59
Biomodels	biomodels/processed/MODEL1507180008.xml	MODEL1507180008	Montagud2010 - Genome-scale metabolic network of Synechocystis sp. PCC6803 (iSyn669)	iSyn669	Synechocystis sp. PCC6803 (iSyn669)	392	498	135	43	212	0.425703	43
Biomodels	biomodels/processed/MODEL1111070001.xml	Bordbar2011_TissueSpecificHepatocyte_MetabolicNetwork	Bordbar2011_TissueSpecific-Hepatocyte_MetabolicNetwork		Tissue Hepatocyte	537	629	146	45	232	0.368839	45
Biomodels	biomodels/processed/MODEL1111070000.xml	Bordbar2011_TissueSpecificAdipocyte_MetabolicNetwork	Bordbar2011_TissueSpecific-Adipocyte_MetabolicNetwork		Tissue Specific Adipocyte	510	578	128	43	245	0.423875	43
Biomodels	biomodels/processed/MODEL1507180036.xml	MODEL1507180036	Pinchuck2010 - Genome-scale metabolic network of Shewanella oneidensis (iSO783)	iSO783	Shewanella oneidensis (iSO783)	528	696	297	46	199	0.28592	30
Biomodels	biomodels/processed/MODEL1011300000.xml	Kim2010_VvuMBEL943_V_vulnificus	Kim2011_VvuMBEL943_2022		Vibrio vulnificus	460	704	137	24	141	0.200284	1
Biomodels	biomodels/processed/MODEL1912100001.xml	COBRAModel	Konduru2020 - Genome-scale metabolic reconstruction and in silico analysis of rice leaf blight pathogen, Xanthomonas oryzae		Xanthomonas oryzae	495	657	330	53	194	0.295282	1
Biomodels	biomodels/processed/MODEL1507180049.xml	MODEL1507180049	Borodina2005 - Genome-scale metabolic network of Streptomyces coelicolor (iIB711)	iIB711	Streptomyces coelicolor	435	906	150	24	89	0.098234	12
					STATS
					MIN	179	193	50	24	24	0.0218579	1
					MAX	1159	1601	738	72	439	0.596817	72
					MEAN	605.85	825.35	332.4	53	196.25	0.284238	48.2
					STD	331.484	509.908	262.577	13.0101	104.07	0.140701	20.426
